# Supplementary material for: Comparative 1H NMR-Based Chemometric Evaluations of the Time-Dependent Generation of Aldehydic Lipid Oxidation Products in Culinary Oils Exposed to Laboratory-Simulated Shallow Frying Episodes: Differential Patterns Observed for Omega-3 Fatty Acid-Containing Soybean Oils
Source: MDPI journal article supplement (doi:10.3390/foods10102481), 2021-10-17
Supplement: s1 [file s1]

For submission to *Foods*

**Title: Comparative <sup>1</sup>H NMR-Based Chemometric Evaluations of the Time-Dependent Generation of Aldehydic Lipid Oxidation Products in Culinary Oils Exposed to Laboratory-Simulated Shallow Frying Episodes: Differential Patterns Observed for Omega-3 Fatty Acid-Containing Soybean Oils**

**Angela I. Wann<sup>1,2</sup>, Benita C. Percival<sup>1</sup>, Katy Woodason<sup>1</sup>, Miles S. Gibson<sup>1</sup>, Siân Vincent<sup>1</sup> and Martin Grootveld<sup>1\*</sup>**

**1 Leicester School of Pharmacy, DeMontfort University, The Gateway, Leicester LE1 9BH, UK; Angela.Allen@dmu.ac.uk (A.I.W.); benita.c.percival@dmu.ac.uk (B.C.P.); katy.woodason@dmu.ac.uk (K.W.); miles.gibson@dmu.ac.uk (M.G.); P2449250@my365.dmu.ac.uk (S.V.)**

**2 School of Life Sciences, Pharmacy and Chemistry, Kingston University, River House, 53–57 High Street, Kingston upon Thames KT1 1LQ, UK**

**\* Correspondence: mgrootveld@dmu.ac.uk**

**SUPPLEMENTARY MATERIALS SECTION**

Figure S1

(a)

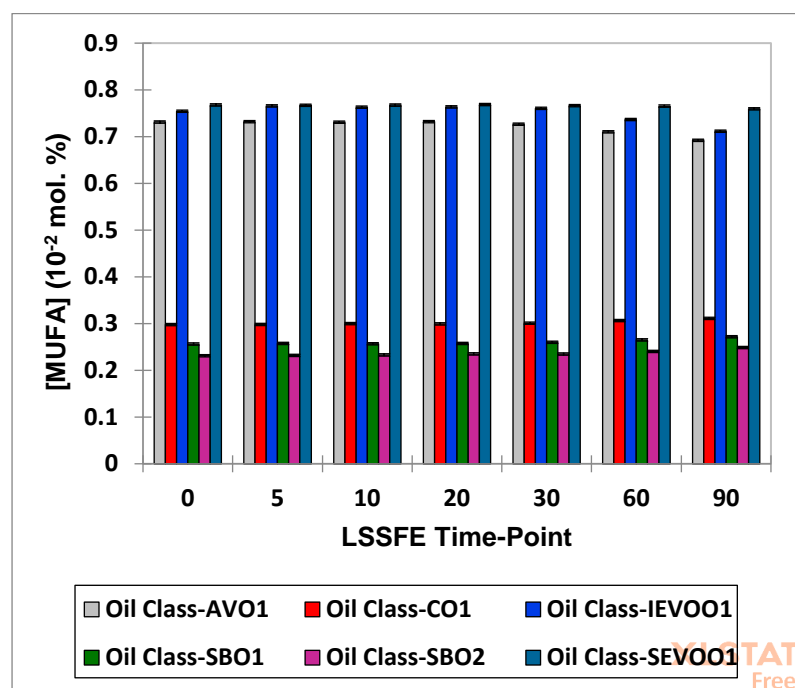

(b)

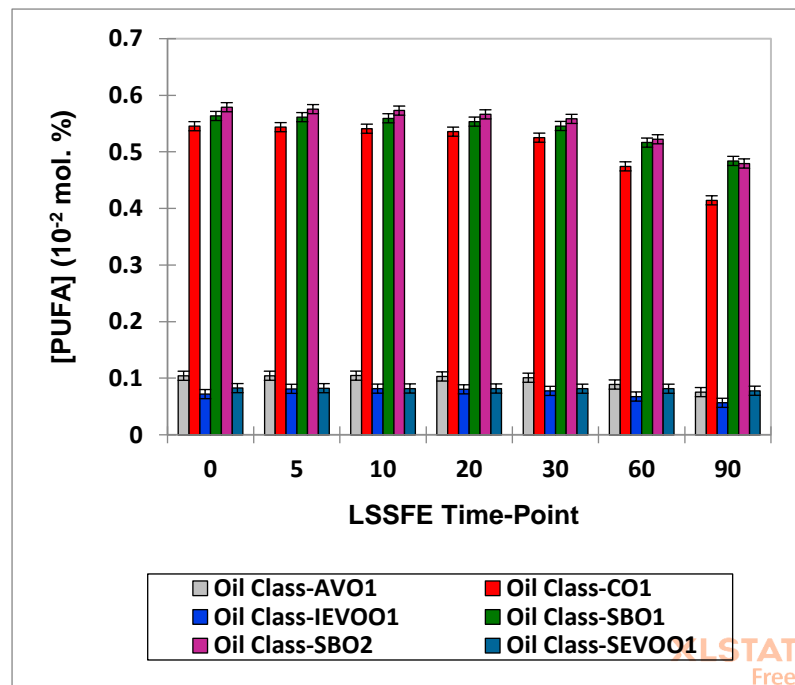

(c)

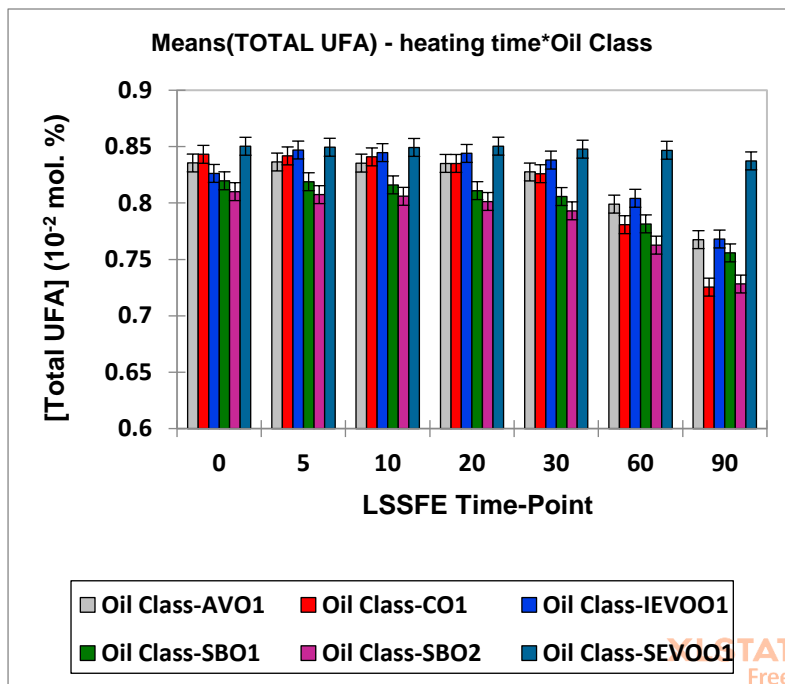

(d)

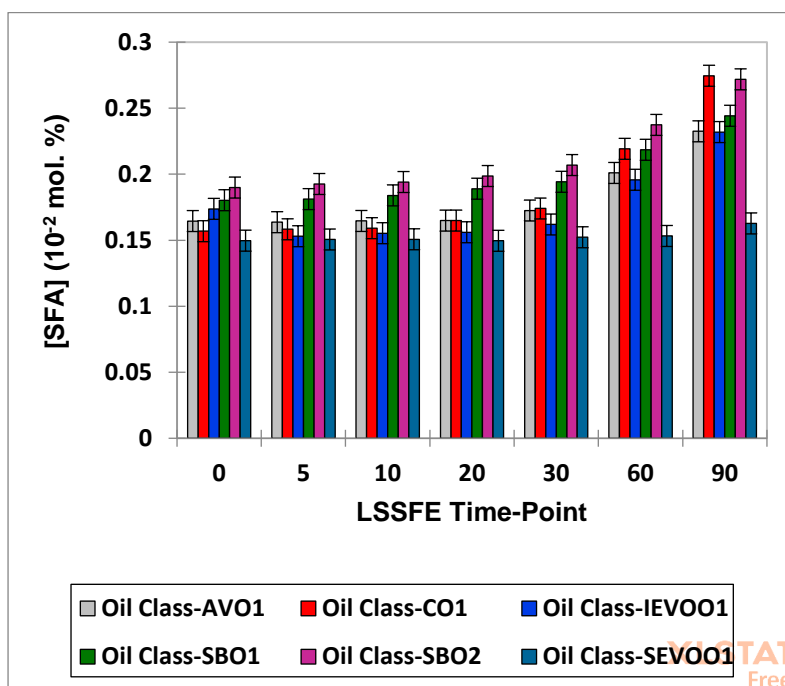

(e)

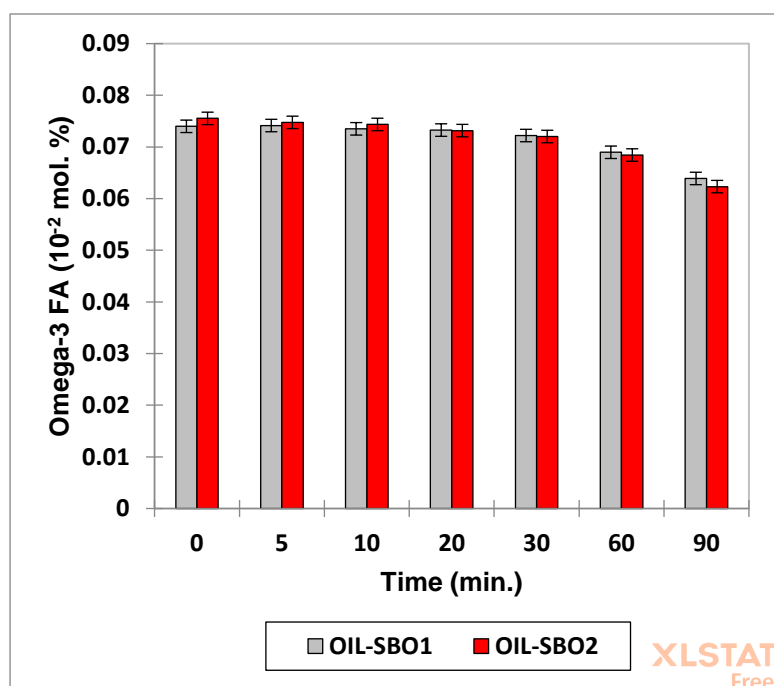

**Figure S1.** Bar diagram plot of mean $\pm$ 95% confidence intervals (CIs) for culinary oil contents of (a) MUFAs, (b) PUFAs, (c) Total UFAs and (d) SFAs in six culinary oils exposed to LSSFes for periods of 0-90 min. (95% CIs in (b) are not clearly visible in S1(a) in view of their extremely small values). (e), Corresponding diagram for the omega-3 FA contents of the two soybean oils investigated. Abbreviations: SBO1 and SBO2, soybean oils 1 and 2; CO1, corn oil 1; AVO1, avocado oil 1; IEVOO1 and SEVOO1, Italian and Spanish extra-virgin olive oils 1 respectively.

**Table S1.** Relative MUFA, PUFA,  $\omega$ -3, total unsaturated and saturated fatty acid contents (molar %) of culinary oils estimated by  $^1\text{H}$  NMR analysis at LSSFE time-points of 0, 5, 10, 20, 30, 60 and 90 min. Oil type abbreviations: as Figure S1. \*(w/w) contents provided by literature sources; na, not applicable.

| Oil    | Heating Time (min.) | Total MUFA Content (molar %) | Total PUFA Content (molar %) | Total UFA Content (molar %) | Total SFA Content (molar %) | $\omega$ -3 FA Content (molar %) |
|--------|---------------------|------------------------------|------------------------------|-----------------------------|-----------------------------|----------------------------------|
| SEVOO1 | 0                   | 76.78                        | 8.25                         | 85.03                       | 14.97                       | 0.80*                            |
|        | 5                   | 76.70                        | 8.24                         | 84.94                       | 15.06                       | na                               |
|        | 10                  | 76.74                        | 8.19                         | 84.93                       | 15.07                       | na                               |
|        | 20                  | 76.86                        | 8.18                         | 85.04                       | 14.96                       | na                               |
|        | 30                  | 76.63                        | 8.15                         | 84.78                       | 15.22                       | na                               |
|        | 60                  | 76.53                        | 8.15                         | 84.68                       | 15.32                       | na                               |
|        | 90                  | 75.94                        | 7.79                         | 83.73                       | 16.27                       | na                               |
| IEVOO1 | 0                   | 75.43                        | 7.19                         | 82.63                       | 17.37                       | 0.80*                            |
|        | 5                   | 76.57                        | 8.12                         | 84.70                       | 15.30                       | na                               |
|        | 10                  | 76.30                        | 8.17                         | 84.47                       | 15.53                       | na                               |
|        | 20                  | 76.36                        | 8.03                         | 84.40                       | 15.60                       | na                               |
|        | 30                  | 76.05                        | 7.76                         | 83.81                       | 16.19                       | na                               |
|        | 60                  | 75.36                        | 7.52                         | 82.88                       | 17.12                       | na                               |
|        | 90                  | 73.66                        | 6.76                         | 80.42                       | 19.58                       | na                               |
| SBO1   | 0                   | 25.62                        | 56.35                        | 81.97                       | 18.03                       | 7.40                             |
|        | 5                   | 25.75                        | 56.14                        | 81.89                       | 18.11                       | 7.41                             |
|        | 10                  | 25.67                        | 55.93                        | 81.61                       | 18.39                       | 7.35                             |
|        | 20                  | 25.75                        | 55.35                        | 81.10                       | 18.90                       | 7.33                             |
|        | 30                  | 26.00                        | 54.58                        | 80.57                       | 19.43                       | 7.22                             |
|        | 60                  | 26.51                        | 51.64                        | 78.15                       | 21.85                       | 6.90                             |
|        | 90                  | 27.18                        | 48.40                        | 75.57                       | 24.43                       | 6.39                             |
| SBO2   | 0                   | 23.12                        | 57.89                        | 81.01                       | 18.99                       | 7.55                             |
|        | 5                   | 23.19                        | 57.55                        | 80.74                       | 19.26                       | 7.48                             |
|        | 10                  | 23.30                        | 57.30                        | 80.59                       | 19.41                       | 7.44                             |
|        | 20                  | 23.51                        | 56.62                        | 80.14                       | 19.86                       | 7.32                             |
|        | 30                  | 23.48                        | 55.82                        | 79.31                       | 20.69                       | 7.20                             |
|        | 60                  | 24.03                        | 52.41                        | 76.44                       | 23.56                       | 6.84                             |
|        | 90                  | 24.87                        | 47.95                        | 72.82                       | 27.18                       | 6.23                             |
| AVO1   | 0                   | 73.11                        | 10.43                        | 83.55                       | 16.45                       | 0.95*                            |
|        | 5                   | 73.19                        | 10.44                        | 83.64                       | 16.36                       | na                               |
|        | 10                  | 73.09                        | 10.45                        | 83.54                       | 16.46                       | na                               |
|        | 20                  | 73.20                        | 10.31                        | 83.51                       | 16.49                       | na                               |
|        | 30                  | 72.66                        | 10.09                        | 82.75                       | 17.25                       | na                               |
|        | 60                  | 71.02                        | 8.88                         | 79.90                       | 20.10                       | na                               |
|        | 90                  | 69.21                        | 7.55                         | 76.75                       | 23.25                       | na                               |
| CO1    | 0                   | 29.60                        | 54.72                        | 84.32                       | 15.68                       | 1.16*                            |
|        | 5                   | 29.85                        | 54.32                        | 84.17                       | 15.83                       | na                               |
|        | 10                  | 29.85                        | 54.24                        | 84.09                       | 15.91                       | na                               |
|        | 20                  | 29.90                        | 53.61                        | 83.51                       | 16.49                       | na                               |
|        | 30                  | 30.04                        | 52.56                        | 82.60                       | 17.40                       | na                               |
|        | 60                  | 30.63                        | 47.45                        | 78.08                       | 21.92                       | na                               |
|        | 90                  | 31.17                        | 41.37                        | 72.54                       | 27.46                       | na                               |

**Table S2.** Mean aldehydic LOP concentrations (mmol./mol. FA) in culinary oils exposed to LSSFES at 180°C FOR 0-90 min. Oil type abbreviations: as Figure S1.

| Oil    | Heating Time (min.) | Concentration (mmol./mol. FA) |                       |                          |                                         |                       |            |                  |                |                  |
|--------|---------------------|-------------------------------|-----------------------|--------------------------|-----------------------------------------|-----------------------|------------|------------------|----------------|------------------|
|        |                     | (E)-2-Alkenals                | (E,E)-2,4-Alkadienals | 4,5-Epoxy-(Z)-2-alkenals | 4-Hydroxy-/4-Hydroperoxy-(E)-2-alkenals | (E,Z)-2,4-Alkadienals | n-Alkanals | 4-Oxo-n-alkanals | LMM n-Alkanals | (Z)-(2)-Alkenals |
| IEVOO1 | 0                   | 0.026                         | 0.060                 | 0.001                    | 0.004                                   | 0.004                 | 0.045      | 0.000            | 0.000          | 0.000            |
|        | 5                   | 0.027                         | 0.049                 | 0.002                    | 0.005                                   | 0.008                 | 0.030      | 0.000            | 0.000          | 0.000            |
|        | 10                  | 0.048                         | 0.043                 | 0.006                    | 0.013                                   | 0.016                 | 0.053      | 0.000            | 0.000          | 0.000            |
|        | 20                  | 0.092                         | 0.056                 | 0.012                    | 0.021                                   | 0.018                 | 0.116      | 0.000            | 0.000          | 0.000            |
|        | 30                  | 0.256                         | 0.112                 | 0.033                    | 0.023                                   | 0.029                 | 0.255      | 0.000            | 0.000          | 0.000            |
|        | 60                  | 0.628                         | 0.215                 | 0.086                    | 0.074                                   | 0.056                 | 0.357      | 0.019            | 0.017          | 0.050            |
|        | 90                  | 1.540                         | 0.478                 | 0.212                    | 0.178                                   | 0.121                 | 0.700      | 0.029            | 0.026          | 0.088            |
| SEVOO1 | 0                   | 0.036                         | 0.038                 | 0.001                    | 0.008                                   | 0.004                 | 0.024      | 0.000            | 0.000          | 0.000            |
|        | 5                   | 0.025                         | 0.041                 | 0.000                    | 0.014                                   | 0.008                 | 0.025      | 0.000            | 0.000          | 0.000            |
|        | 10                  | 0.033                         | 0.046                 | 0.000                    | 0.008                                   | 0.005                 | 0.030      | 0.000            | 0.000          | 0.000            |
|        | 20                  | 0.070                         | 0.029                 | 0.004                    | 0.011                                   | 0.013                 | 0.038      | 0.000            | 0.000          | 0.000            |
|        | 30                  | 0.032                         | 0.040                 | 0.001                    | 0.004                                   | 0.010                 | 0.031      | 0.000            | 0.000          | 0.000            |
|        | 60                  | 0.041                         | 0.033                 | 0.003                    | 0.011                                   | 0.013                 | 0.049      | 0.000            | 0.000          | 0.000            |
|        | 90                  | 0.293                         | 0.127                 | 0.059                    | 0.049                                   | 0.050                 | 0.291      | 0.000            | 0.000          | 0.000            |
| SBO1   | 0                   | 0.051                         | 0.045                 | 0.012                    | 0.014                                   | 0.021                 | 0.094      | 0.000            | 0.000          | 0.000            |
|        | 5                   | 0.072                         | 0.060                 | 0.026                    | 0.033                                   | 0.041                 | 0.113      | 0.000            | 0.000          | 0.000            |
|        | 10                  | 0.129                         | 0.127                 | 0.045                    | 0.058                                   | 0.062                 | 0.157      | 0.000            | 0.000          | 0.000            |
|        | 20                  | 0.270                         | 0.339                 | 0.071                    | 0.088                                   | 0.111                 | 0.271      | 0.000            | 0.000          | 0.000            |
|        | 30                  | 0.556                         | 0.709                 | 0.159                    | 0.170                                   | 0.205                 | 0.493      | 0.000            | 0.000          | 0.000            |
|        | 60                  | 1.530                         | 1.690                 | 0.416                    | 0.390                                   | 0.476                 | 1.070      | 0.088            | 0.047          | 0.057            |
|        | 90                  | 2.660                         | 2.450                 | 0.616                    | 0.589                                   | 0.529                 | 1.400      | 0.142            | 0.053          | 0.092            |
| SBO2   | 0                   | 0.054                         | 0.057                 | 0.020                    | 0.036                                   | 0.032                 | 0.051      | 0.000            | 0.000          | 0.000            |
|        | 5                   | 0.089                         | 0.106                 | 0.037                    | 0.039                                   | 0.049                 | 0.091      | 0.000            | 0.000          | 0.000            |
|        | 10                  | 0.151                         | 0.215                 | 0.060                    | 0.056                                   | 0.099                 | 0.150      | 0.000            | 0.000          | 0.000            |
|        | 20                  | 0.402                         | 0.564                 | 0.127                    | 0.120                                   | 0.218                 | 0.342      | 0.000            | 0.000          | 0.000            |
|        | 30                  | 0.679                         | 0.909                 | 0.204                    | 0.166                                   | 0.318                 | 0.569      | 0.000            | 0.000          | 0.000            |
|        | 60                  | 1.930                         | 2.190                 | 0.517                    | 0.395                                   | 0.672                 | 1.300      | 0.106            | 0.050          | 0.084            |
|        | 90                  | 3.580                         | 3.350                 | 0.894                    | 0.666                                   | 0.971                 | 2.050      | 0.216            | 0.108          | 0.132            |
| AVO1   | 0                   | 0.047                         | 0.025                 | 0.015                    | 0.020                                   | 0.013                 | 0.062      | 0.000            | 0.000          | 0.000            |
|        | 5                   | 0.041                         | 0.024                 | 0.009                    | 0.016                                   | 0.009                 | 0.074      | 0.000            | 0.000          | 0.000            |
|        | 10                  | 0.072                         | 0.037                 | 0.018                    | 0.018                                   | 0.012                 | 0.099      | 0.000            | 0.000          | 0.000            |
|        | 20                  | 0.181                         | 0.101                 | 0.043                    | 0.043                                   | 0.036                 | 0.232      | 0.000            | 0.000          | 0.000            |
|        | 30                  | 0.470                         | 0.238                 | 0.078                    | 0.062                                   | 0.060                 | 0.437      | 0.020            | 0.017          | 0.018            |
|        | 60                  | 1.640                         | 0.589                 | 0.240                    | 0.191                                   | 0.136                 | 0.881      | 0.064            | 0.021          | 0.029            |
|        | 90                  | 3.210                         | 0.795                 | 0.367                    | 0.311                                   | 0.146                 | 1.260      | 0.102            | 0.028          | 0.058            |
| CO1    | 0                   | 0.80                          | 0.126                 | 0.042                    | 0.032                                   | 0.057                 | 0.143      | 0.000            | 0.000          | 0.000            |
|        | 5                   | 0.063                         | 0.111                 | 0.037                    | 0.031                                   | 0.047                 | 0.149      | 0.000            | 0.000          | 0.000            |

|  |    |       |       |       |       |       |       |       |       |       |
|--|----|-------|-------|-------|-------|-------|-------|-------|-------|-------|
|  | 10 | 0.091 | 0.117 | 0.039 | 0.030 | 0.050 | 0.167 | 0.000 | 0.000 | 0.000 |
|  | 20 | 0.231 | 0.265 | 0.073 | 0.057 | 0.09  | 0.310 | 0.000 | 0.000 | 0.000 |
|  | 30 | 0.555 | 0.599 | 0.156 | 0.130 | 0.206 | 0.564 | 0.000 | 0.000 | 0.000 |
|  | 60 | 2.310 | 2.030 | 0.514 | 0.393 | 0.580 | 1.370 | 0.136 | 0.041 | 0.123 |
|  | 90 | 4.500 | 3.050 | 0.887 | 0.676 | 0.780 | 2.120 | 0.211 | 0.058 | 0.209 |

**Table S3.** Total levels of unsaturated and saturated aldehydes (mmol./mol. FA) in each culinary oil exposed to LSSFES for periods of 0, 5, 10, 20, 30, 60 and 90 min. Oil class abbreviations: as Figure S1.

| Aldehyde Class | Oil Type | Time (min.)                            |      |      |      |      |      |       |
|----------------|----------|----------------------------------------|------|------|------|------|------|-------|
|                |          | 0                                      | 5    | 10   | 20   | 30   | 60   | 90    |
|                |          | Aldehyde Concentration (mmol./mol. FA) |      |      |      |      |      |       |
| Unsaturated    | IEVOO1   | 0.09                                   | 0.09 | 0.13 | 0.20 | 0.45 | 1.10 | 2.62  |
|                | SEVOO1   | 0.09                                   | 0.09 | 0.09 | 0.13 | 0.09 | 0.10 | 0.58  |
|                | AO1      | 0.15                                   | 0.15 | 0.19 | 0.34 | 0.95 | 3.12 | 4.76  |
|                | SBO1     | 0.14                                   | 0.23 | 0.42 | 0.88 | 1.80 | 4.56 | 6.95  |
|                | SBO2     | 0.20                                   | 0.30 | 0.58 | 1.43 | 2.28 | 5.82 | 9.67  |
|                | CO1      | 0.34                                   | 0.29 | 0.33 | 0.72 | 1.65 | 5.95 | 10.10 |
| Saturated      | IEVOO1   | 0.04                                   | 0.03 | 0.05 | 0.12 | 0.26 | 0.42 | 0.75  |
|                | SEVOO1   | 0.02                                   | 0.03 | 0.03 | 0.04 | 0.03 | 0.05 | 0.29  |
|                | AO1      | 0.19                                   | 0.20 | 0.23 | 0.32 | 0.55 | 1.22 | 1.48  |
|                | SBO1     | 0.09                                   | 0.11 | 0.16 | 0.27 | 0.49 | 1.21 | 1.60  |
|                | SBO2     | 0.05                                   | 0.09 | 0.15 | 0.34 | 0.57 | 1.62 | 2.37  |
|                | CO1      | 0.14                                   | 0.15 | 0.17 | 0.31 | 0.56 | 1.54 | 2.39  |



**Table S4.** Least square mean (LSM) values for aldehydic LOP concentrations generated in soybean, corn, avocado and extra-virgin olive oils when exposed to LSSFEC cycles for 0-90 min., and summary of all pairwise comparisons made to determine the significance of their differences between different culinary oil products (Bonferroni-corrected). (a), (*E*)-2-alkenals; (b), (*E,E*)-2,4-alkadienals; (c), 4,5-Epoxy-(*E*)-2-alkenals; (d), 4-OH-/4-OOH-(*E*)-2-alkenals; (e), (*E,Z*)-2,4-alkadienals; (f), *n*-alkanals; (g), 4-oxo-*n*-alkanals; (h) (*Z*)-2-alkenals; (i), low-molecular-mass (LMM) *n*-alkanals. For each aldehyde, culinary oil LSMs which are significantly different from each other have differing letter codes (A-E). The statistical significance of differences between individual culinary oil products were determined by *post-hoc* ANOVA tests performed by the Bonferroni method. Oil product abbreviations correspond to those in Figure S1.

| (a)          |                                            |                                |   |   |   |  |
|--------------|--------------------------------------------|--------------------------------|---|---|---|--|
| Culinary Oil | LSMs (( <i>E</i> )-2-Alkenals)             | Significantly Different Groups |   |   |   |  |
| SEVOO        | 0.08                                       | A                              |   |   |   |  |
| IEVOO        | 0.71                                       |                                | B |   |   |  |
| SBO1         | 0.75                                       |                                | B | C |   |  |
| AVO1         | 0.81                                       |                                | B | C |   |  |
| SBO2         | 0.98                                       |                                |   | C | D |  |
| CO1          | 1.12                                       |                                |   |   | D |  |
| (b)          |                                            |                                |   |   |   |  |
| Culinary Oil | LSMs (( <i>E,E</i> )-2-4-Alkadienals)      | Groups                         |   |   |   |  |
| SEVOO1       | 0.05                                       | A                              |   |   |   |  |
| IEVOO1       | 0.20                                       |                                | B |   |   |  |
| AVO1         | 0.26                                       |                                | B |   |   |  |
| SBO1         | 0.77                                       |                                |   | C |   |  |
| CO1          | 0.90                                       |                                |   | C |   |  |
| SBO2         | 1.06                                       |                                |   |   | D |  |
| (c)          |                                            |                                |   |   |   |  |
| Culinary Oil | LSMs (4,5-Epoxy-( <i>E</i> )-2-alkenals)   | Groups                         |   |   |   |  |
| IEVVOO1      | 0.01                                       | A                              |   |   |   |  |
| SEVOO1       | 0.08                                       |                                | B |   |   |  |
| AVO1         | 0.11                                       |                                | B |   |   |  |
| SBO1         | 0.19                                       |                                |   | C |   |  |
| CO1          | 0.25                                       |                                |   |   | D |  |
| SBO2         | 0.27                                       |                                |   |   | D |  |
| (d)          |                                            |                                |   |   |   |  |
| Culinary Oil | LSMs (4-OH-/4-OOH-( <i>E</i> )-2-Alkenals) | Groups                         |   |   |   |  |
| SEVOO1       | 0.02                                       | A                              |   |   |   |  |
| IEVOO1       | 0.08                                       |                                | B |   |   |  |
| AVO1         | 0.09                                       |                                | B |   |   |  |

|              |                                       |        |   |   |   |   |
|--------------|---------------------------------------|--------|---|---|---|---|
| SBO1         | 0.19                                  |        |   | C |   |   |
| CO1          | 0.19                                  |        |   | C |   |   |
| SBO2         | 0.21                                  |        |   | C |   |   |
| (e)          |                                       |        |   |   |   |   |
| Culinary Oil | LSMs (( <i>E,Z</i> )-2,4-Alkadienals) | Groups |   |   |   |   |
| SEVOO1       | 0.01                                  | A      |   |   |   |   |
| IEVOO1       | 0.05                                  | A      | B |   |   |   |
| AVO1         | 0.06                                  |        | B |   |   |   |
| SBO1         | 0.21                                  |        |   | C |   |   |
| CO1          | 0.26                                  |        |   |   | D |   |
| SBO2         | 0.34                                  |        |   |   |   | E |
| (f)          |                                       |        |   |   |   |   |
| Culinary Oil | LSMs ( <i>n</i> -Alkanals)            | Groups |   |   |   |   |
| SEVOO1       | 0.07                                  | A      |   |   |   |   |
| IEVOO1       | 0.32                                  |        | B |   |   |   |
| AVO1         | 0.43                                  |        |   | C |   |   |
| SBO1         | 0.51                                  |        |   | C |   |   |
| SBO2         | 0.65                                  |        |   |   | D |   |
| CO1          | 0.69                                  |        |   |   | D |   |
| (g)          |                                       |        |   |   |   |   |
| Culinary Oil | LSMs (4-Oxo- <i>n</i> -alkanals)      | Groups |   |   |   |   |
| SEVOO1       | 0.00                                  | A      |   |   |   |   |
| IEVOO1       | 0.01                                  | A      | B |   |   |   |
| AVO1         | 0.01                                  | A      | B | C |   |   |
| SBO1         | 0.03                                  |        | B | C | D |   |
| SBO2         | 0.05                                  |        |   | C | D |   |
| CO1          | 0.05                                  |        |   |   | D |   |
| (h)          |                                       |        |   |   |   |   |
| Culinary Oil | LSMs (( <i>Z</i> )-2-Alkenals)        | Groups |   |   |   |   |
| SEVOO1       | 0.00                                  | A      |   |   |   |   |
| IEVOO1       | 0.02                                  | A      | B |   |   |   |
| SBO1         | 0.02                                  | A      | B |   |   |   |
| AVO1         | 0.03                                  |        | B | C |   |   |
| SBO2         | 0.03                                  |        | B | C |   |   |
| CO1          | 0.05                                  |        |   | C |   |   |
| (i)          |                                       |        |   |   |   |   |
| Culinary Oil | LSMs (LMM <i>n</i> -Alkanals)         | Groups |   |   |   |   |
| SEVOO1       | 0.00                                  | A      |   |   |   |   |
| IEVOO1       | 0.01                                  | A      | B |   |   |   |

|             |      |  |   |   |   |  |
|-------------|------|--|---|---|---|--|
| <b>AVO1</b> | 0.01 |  | B | C |   |  |
| <b>CO1</b>  | 0.01 |  | B | C | D |  |
| <b>SBO1</b> | 0.02 |  |   | C | D |  |
| <b>SBO2</b> | 0.02 |  |   |   | D |  |
